# Supplementary material for: High fluorescence efficiency of intrinsic ligand-free zero-dimensional Cs4PbBr6 particles and microcrystals
Source: Royal Society of Chemistry journal article supplement (doi:10.1039/d1tc02571f), 2021-01-01
Supplement: d1tc02571f1.pdf [file d1tc02571f1.pdf]

## **High Fluorescence Efficiency of Intrinsic Ligand-Free Zero-Dimensional Cs<sub>4</sub>PbBr<sub>6</sub> Particles and Microcrystals**

Wei-Long Xu<sup>a,b</sup>, Jonathan M. White<sup>b</sup>, Kenneth P. Ghiggino<sup>b</sup> and Trevor A. Smith<sup>b\*</sup>

<sup>a</sup>School of Photoelectric Engineering, Changzhou Institute of Technology, Changzhou, Jiangsu 213002, China

<sup>b</sup>ARC Centre of Excellence in Exciton Science, School of Chemistry, The University of Melbourne, Parkville, Victoria 3010, Australia

\*Corresponding author. E-mail: [trevoras@unimelb.edu.au](mailto:trevoras@unimelb.edu.au) (T.A. Smith);

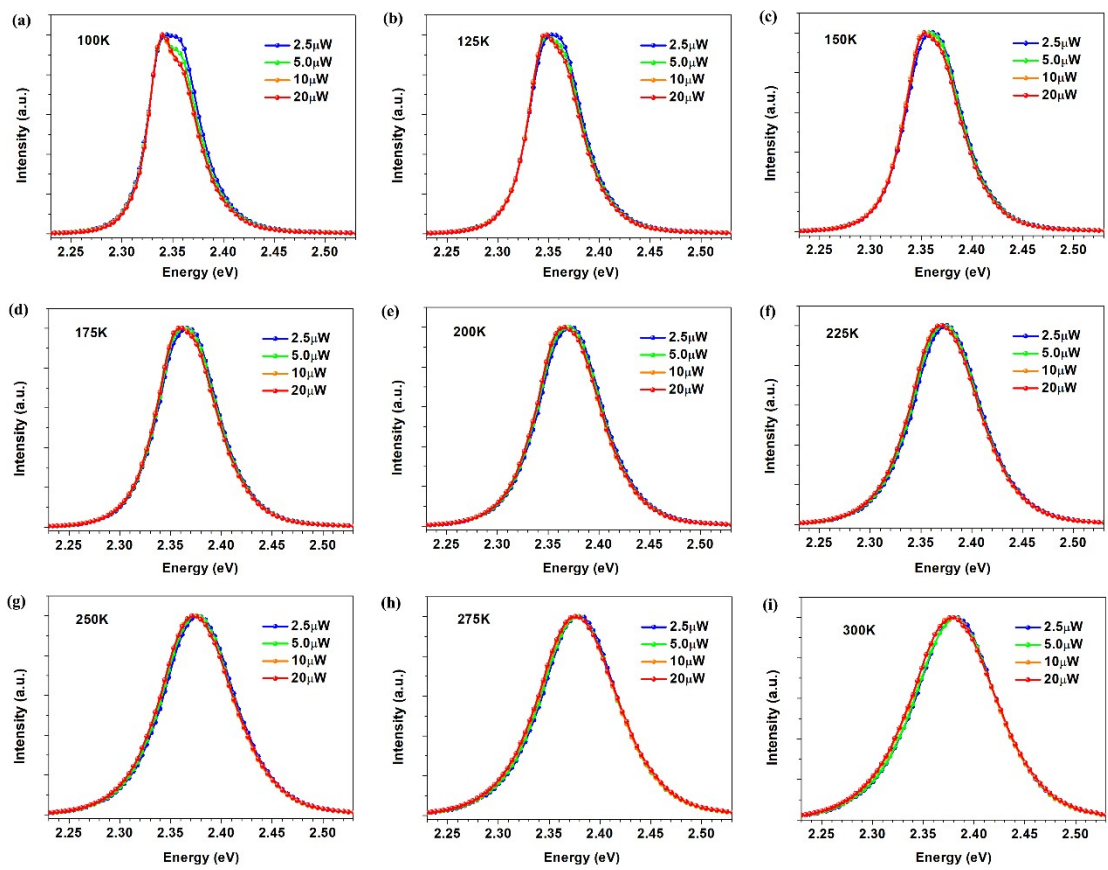

Figure S1. PL spectra of  $\text{Cs}_4\text{PbBr}_6$  particles measured from 100K to 300K under different excitation intensities at 400 nm

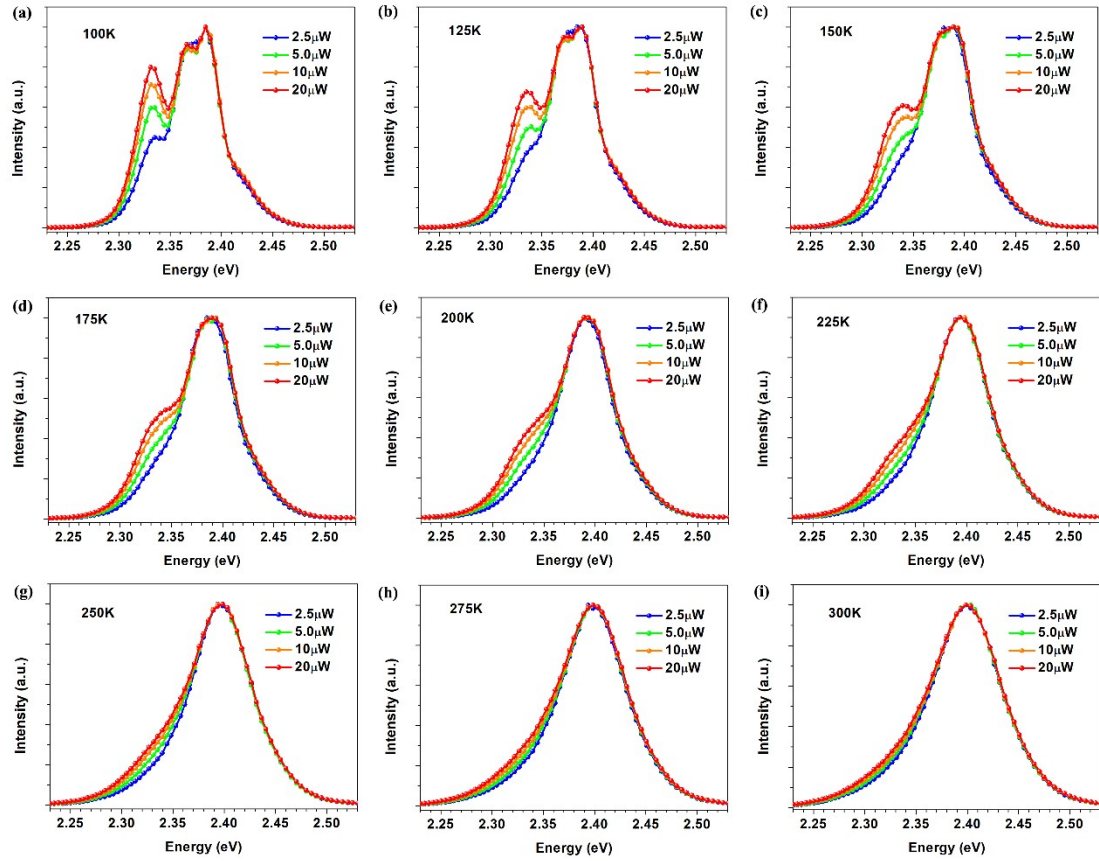

Figure S2. PL spectra of  $\text{Cs}_4\text{PbBr}_6$  microcrystals measured from 100K to 300K under different excitation intensities at 400 nm.

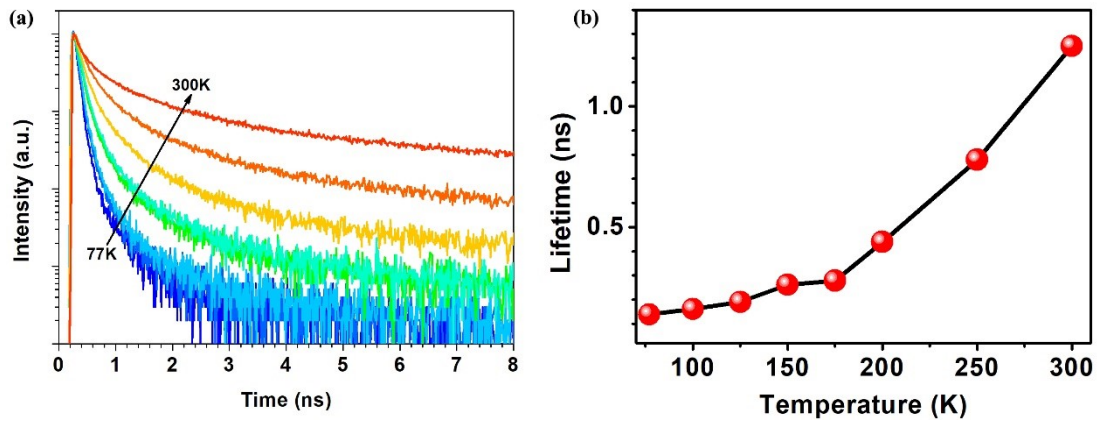

Figure S3. Temperature dependent PL decay profiles (emission wavelength 525 nm) of  $\text{Cs}_4\text{PbBr}_6$  particles at different temperatures in the 8 ns time window; (b) Intensity-average PL lifetimes of  $\text{Cs}_4\text{PbBr}_6$  particles at different temperatures.

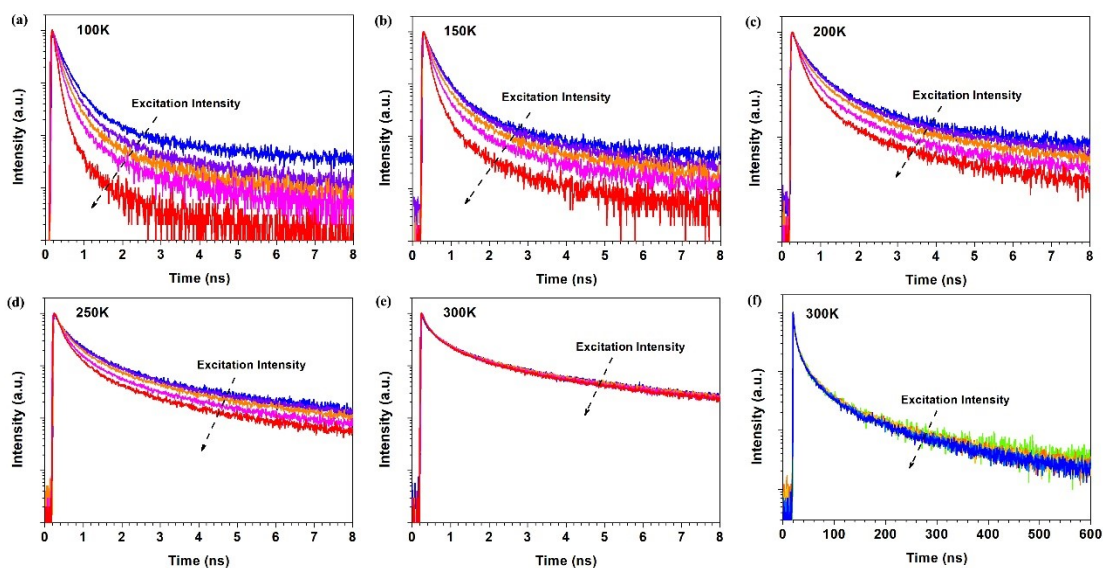

Figure S4. (a-e) Excitation intensity dependent PL decay profiles (emission wavelength 525 nm) of  $\text{Cs}_4\text{PbBr}_6$  particles at 100K, 150K, 200K, 250K and 300K on a short (8 ns) time window; (f) Excitation intensity dependent PL decay profiles of  $\text{Cs}_4\text{PbBr}_6$  particles at 300K on a long (600 ns) time window.

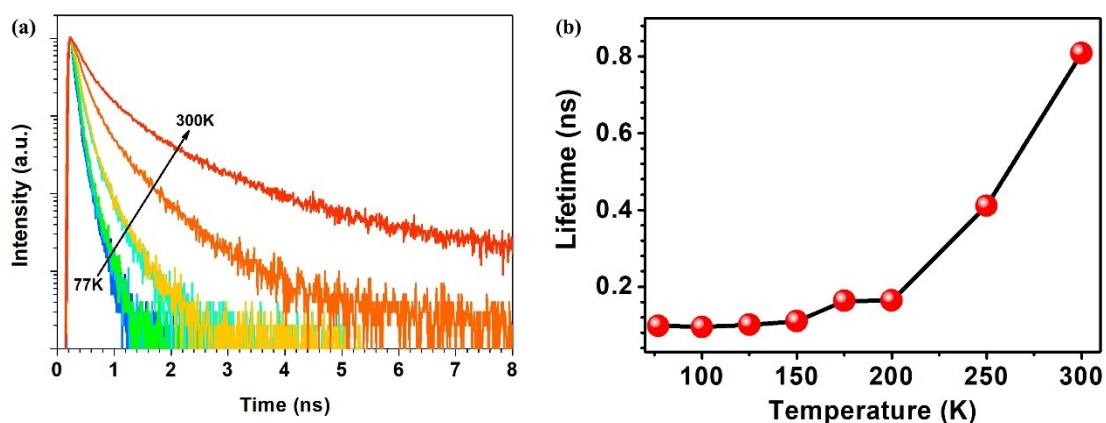

Figure S5. Temperature dependent PL decay profiles (emission wavelength 522 nm) of  $\text{Cs}_4\text{PbBr}_6$  microcrystals at different temperatures in the 8 ns time window; (b) short PL lifetimes of  $\text{Cs}_4\text{PbBr}_6$  microcrystals at different temperatures.

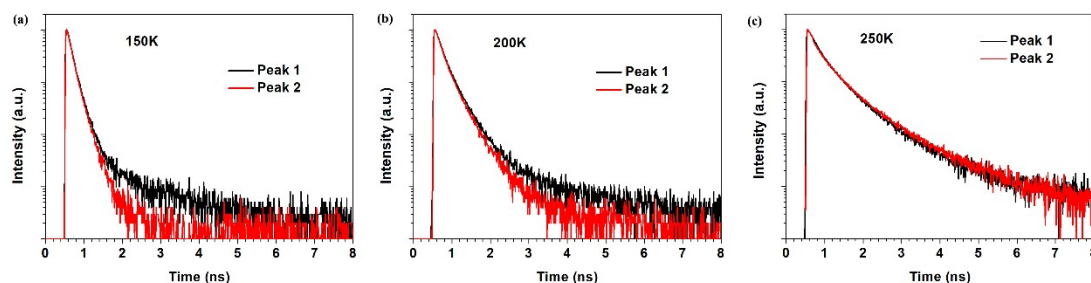

Figure S6. PL decay profiles of  $\text{Cs}_4\text{PbBr}_6$  microcrystals measured at different emission wavelengths (peak1 532 nm and peak2 522 nm) at different temperatures.

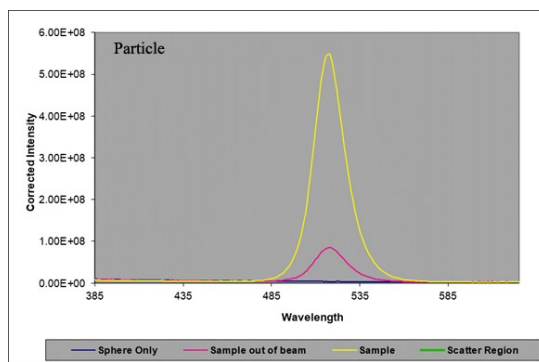

| Results               |               |              |                  |
|-----------------------|---------------|--------------|------------------|
| Absorption            | 20.3%         | <b>Color</b> |                  |
| Transmission          | 79.7%         | x            | 0.0971 u' 0.0324 |
| Absorbance            | 0.10          | y            | 0.7665 v' 0.5747 |
| <b>Quantum Yield:</b> | <b>116.3%</b> |              |                  |
| <b>Corrected QY:</b>  | <b>85.1%</b>  |              |                  |

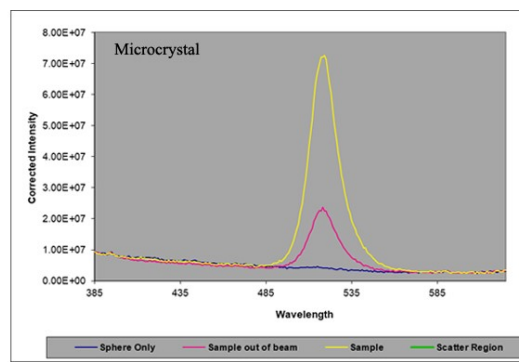

| Results               |               |              |                  |
|-----------------------|---------------|--------------|------------------|
| Absorption            | 5.9%          | <b>Color</b> |                  |
| Transmission          | 94.1%         | x            | 0.1059 u' 0.0347 |
| Absorbance            | 0.03          | y            | 0.7838 v' 0.5785 |
| <b>Quantum Yield:</b> | <b>178.1%</b> |              |                  |
| <b>Corrected QY:</b>  | <b>32.5%</b>  |              |                  |

Figure S7. Photoluminescence quantum yield measurement of  $\text{Cs}_4\text{PbBr}_6$  particles and microcrystals in an integrating sphere.
